# Supplementary material for: Exercise training characteristics in cardiac rehabilitation programmes: a cross-sectional survey of Australian practice
Source: PubMed Central journal article supplement — Open Heart. 2016 Feb 23;3(1):e000374. doi: 10.1136/openhrt-2015-000374 (PMC4847132; doi:10.1136/openhrt-2015-000374), 2016-02-23
Supplement: openhrt-2015-000374supp_appendix2.pdf [file openhrt-2015-000374supp_appendix2.pdf]

Appendix 2: Number of sites excluded from survey with reasons

| Reason for ineligibility (n=97)                                          | Number of sites (%) |
|--------------------------------------------------------------------------|---------------------|
| Offer education/support with exercise via referral to external providers | 28 (30)             |
| No longer/not currently running                                          | 24 (26)             |
| Duplicate program offered at another site                                | 18 (19)             |
| Maintenance (Phase 3) program only                                       | 8 (9)               |
| Offer education only                                                     | 7 (8)               |
| Offer service for Heart Failure patients only                            | 4 (4)               |
| General health program with unstructured gentle exercise component       | 3 (3)               |
| Inpatient (Phase 1) program only                                         | 1 (1)               |
