# Supplementary material for: Exercise training characteristics in cardiac rehabilitation programmes: a cross-sectional survey of Australian practice
Source: PubMed Central journal article supplement — Open Heart. 2016 Feb 23;3(1):e000374. doi: 10.1136/openhrt-2015-000374 (PMC4847132; doi:10.1136/openhrt-2015-000374), 2016-02-23
Supplement: openhrt-2015-000374supp_appendix3.pdf [file openhrt-2015-000374supp_appendix3.pdf]

Appendix 3: Program characteristics of non-responding CR sites (obtained from service directories)

| <b>Program Characteristic</b>                             | <b>Number of programs (%)</b>            |
|-----------------------------------------------------------|------------------------------------------|
| <b>Type of Program</b>                                    |                                          |
| Comprehensive                                             | 39 (72.2)                                |
| Exercise only (with exercise physiologist)                | 5 (9.3)                                  |
| Education only                                            | 2 (3.7) ( <i>likely not eligible</i> )   |
| Modular                                                   | 1 (1.9)                                  |
| Education with exercise plan (with exercise physiologist) | 1 (1.9)                                  |
| Education/support with referral                           | 1 (1.9) ( <i>likely not eligible</i> )   |
| Case-management monitoring                                | 1 (1.9) ( <i>likely not eligible</i> )   |
| Unknown                                                   | 4 (7.4) ( <i>possibly not eligible</i> ) |
| <b>Length</b>                                             |                                          |
| Less than six weeks                                       | 2 (3.7)                                  |
| 6-8 weeks                                                 | 29 (53.7)                                |
| More than 8 weeks                                         | 3 (5.6)                                  |
| Ongoing                                                   | 1 (1.9)                                  |
| Unknown                                                   | 19 (35.2)                                |
| <b>Exercise Session Time</b>                              |                                          |
| 30 mins                                                   | 1 (1.9)                                  |
| 60 mins                                                   | 7 (13.0)                                 |
| Unknown                                                   | 46 (85.2)                                |
| <b>Frequency</b>                                          |                                          |
| 1 x week                                                  | 19 (35.2)                                |
| 2 x week                                                  | 11 (20.4)                                |
| 3 x week                                                  | 1 (1.9)                                  |
| 2-4 x week                                                | 1 (1.9)                                  |
| Unknown                                                   | 22 (40.7)                                |
| <b>Location</b>                                           |                                          |
| Hospital/outpatient                                       | 1 (1.9)                                  |
| Choice (home or centre)                                   | 4 (7.4)                                  |
| Home                                                      | 5 (9.3)                                  |
| Community                                                 | 2 (3.7)                                  |
| Unknown                                                   | 42 (78.8)                                |
