# Supplementary material for: Exercise training characteristics in cardiac rehabilitation programmes: a cross-sectional survey of Australian practice
Source: PubMed Central journal article supplement — Open Heart. 2016 Feb 23;3(1):e000374. doi: 10.1136/openhrt-2015-000374 (PMC4847132; doi:10.1136/openhrt-2015-000374), 2016-02-23
Supplement: openhrt-2015-000374supp_appendix4.pdf [file openhrt-2015-000374supp_appendix4.pdf]

**Appendix 4.** Aerobic exercise training modalities reported by sites (n=235)

| Aerobic Exercise Modality  | Number of Programs (%) |
|----------------------------|------------------------|
| Cycling                    | 216 (91.9)             |
| Walking (not on treadmill) | 193 (82.1)             |
| Treadmill                  | 184 (78.3)             |
| Arm Ergometer              | 148 (63.0)             |
| Stairs/Stepper             | 136 (57.9)             |
| Rower                      | 65 (27.7)              |
| Cross-trainer              | 48 (20.4)              |
| Games (e.g. Ball Games)    | 20 (8.5)               |
| Pool exercise/aerobics     | 8 (3.4)                |
| Swimming                   | 2 (0.9)                |
| <i>Other</i>               | 9 (3.8)                |

*\*Other modalities added as additional text entries: mini-tramp (n=7), Zorba dancing (n=1), boxing (n=1)*
